# Supplementary material for: CuO nanosheets/rGO hybrid lamellar films with enhanced capacitance
Source: Royal Society of Chemistry journal article supplement (doi:10.1039/c3nr02737f), 2013-01-01
Supplement: c3nr02737f.pdf [file c3nr02737f.pdf]

## Supporting Information

### **CuO nanosheets/rGO hybrid lamellar films with enhanced capacitance**

Yu Liu,<sup>a</sup> Yulong Ying,<sup>a</sup> Yiyin Mao,<sup>a</sup> Lin Gu,<sup>b</sup> Yewu Wang,<sup>b</sup> Xinsheng Peng<sup>a,c\*</sup>

<sup>a</sup>*State Key Laboratory of Silicon Materials, Department of Materials Science and Engineering, Zhejiang University, Hangzhou, 310027, P. R. China.*

<sup>b</sup>*Department of Physics & State Key Laboratory of Silicon Materials, Zhejiang University, Hangzhou, 310027, P. R. China.*

<sup>c</sup>*Cyrus Tang Center for Sensor Materials and Applications, Zhejiang University, Hangzhou 310027, China. Fax: 86-571-87952625; Tel: 86-571-87951958*

*E-mail: [pengxinsheng@zju.edu.cn](mailto:pengxinsheng@zju.edu.cn)*

### 1. Cyclic voltammetry curves of the CuO NSs/rGO-8 and CuO NSs/rGO-2

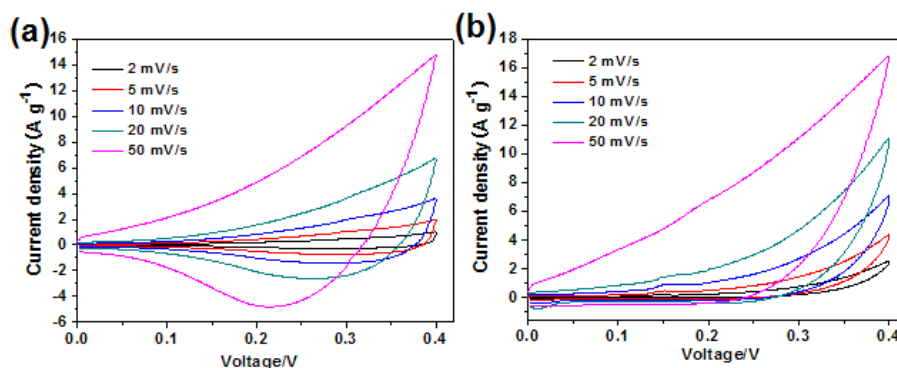

Fig. S1. (a, b) CV curves of the CuO NSs/rGO-8 and CuO NSs/rGO-2 at different scan rates in 6 M KOH aqueous solution, respectively.

### 2. Galvanostatic constant-current charge/discharge performance of CuO NSs

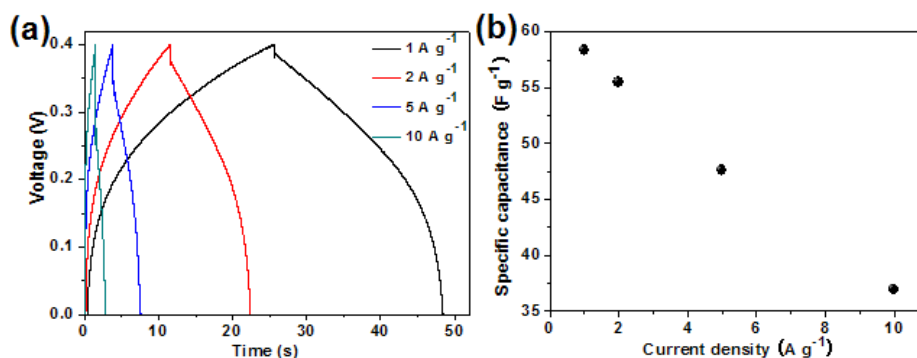

Fig. S2. (a) Galvanostatic constant-current charge/discharge performance of CuO NSs electrode and (b) capacitance calculated from (a).

### 3. Nitrogen adsorption–desorption isotherms of CuO NSs, CuO NSs/GO-4, and rGO

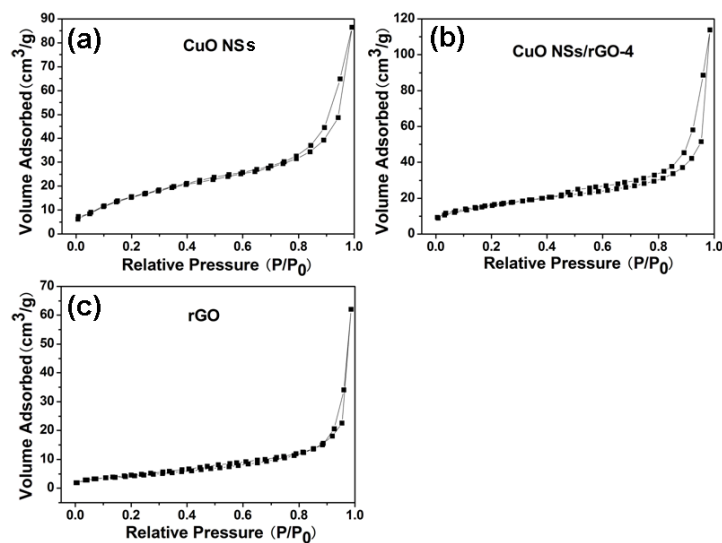

Fig. S3. Nitrogen adsorption–desorption isotherms of CuO NSs (a), CuO NSs/GO-4 (b) and rGO (c).
